# Supplementary material
Source: Springer Nature journal article supplement (https://www.springermedizin.de/resource/supplementary/13012_2014_789_MOESM1_ESM.pdf/9630696)
Supplement: MOESM1 [file 9630696]

**Step 1.** Develop sociotechnical scenarios  
Literature review + Foresights + Expert Committee

**Step 2.** Develop multimedia support for each scenario  
Research team + Expert Committee

**Step 3.** Public appraisal of the sociotechnical scenarios  
Workshops + Forum + Participant survey

**Step 4.** Integrate data sources and summarize results  
Observation + Transcripts + Survey results  
Feedback to Expert Committee

**RO.1** Analyze the ways in which members of the public reason and deliberate around the desirability of technical and social changes that may affect three thematic areas within a 25-year timeframe

**RO.2** Identify the usability and ethical issues raised by various design assumptions and features in three thematic areas

**RO.3** Assess the extent to which the sociotechnical scenario method fosters critical, reflective and creative deliberations around the design of health innovations
